# Supplementary material
Source: publisher figshare collection journal article supplement (https://gsajournals.figshare.com/ndownloader/files/18079607)
Supplement: Supplementary file 1 [file 18079607]

**Figure S1**

**A**

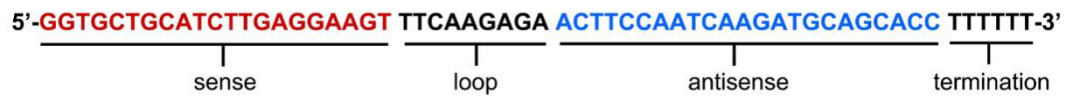

**B**

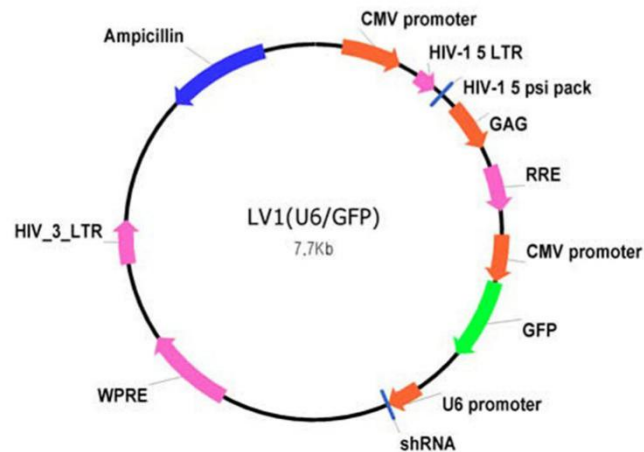

**Figure S1. The shRNA construct targeting *Amh* and vector map.** (A) The designed shRNA construct contained a unique double-stranded *Amh* sequence that presented as an inverted complementary repeat (5'-GGTGCTGCATCTTGAGGAAGT-3'), a loop sequence (5'-TTCAAGAGA-3') and the RNA Plo-II terminator (5'-TTTTTT-3') . (B) The pU6/GFP plasmid used for cloning GFP and shRNA against turtle *Amh*.

**Figure S2**

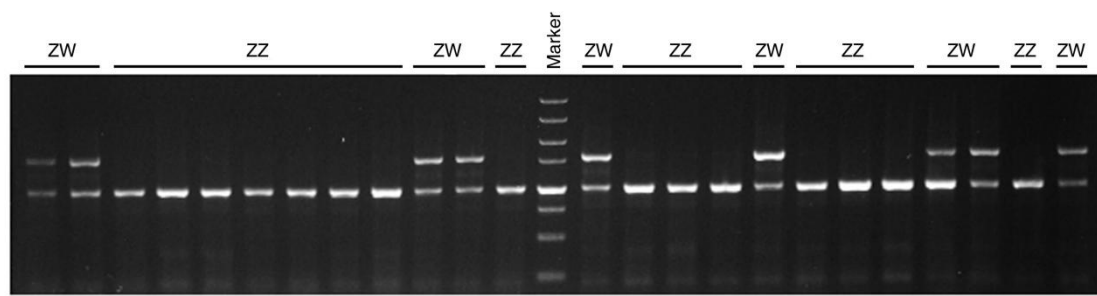

**Figure S2. Sex-diagnostic amplification in *Pelodiscus sinensis*.** Lower bands represent Z-linked amplified fragments, and higher bands represent W-linked sex-diagnostic fragments. One- and two-band indicated genetic male (ZZ) and female (ZW), respectively.

### Figure S3

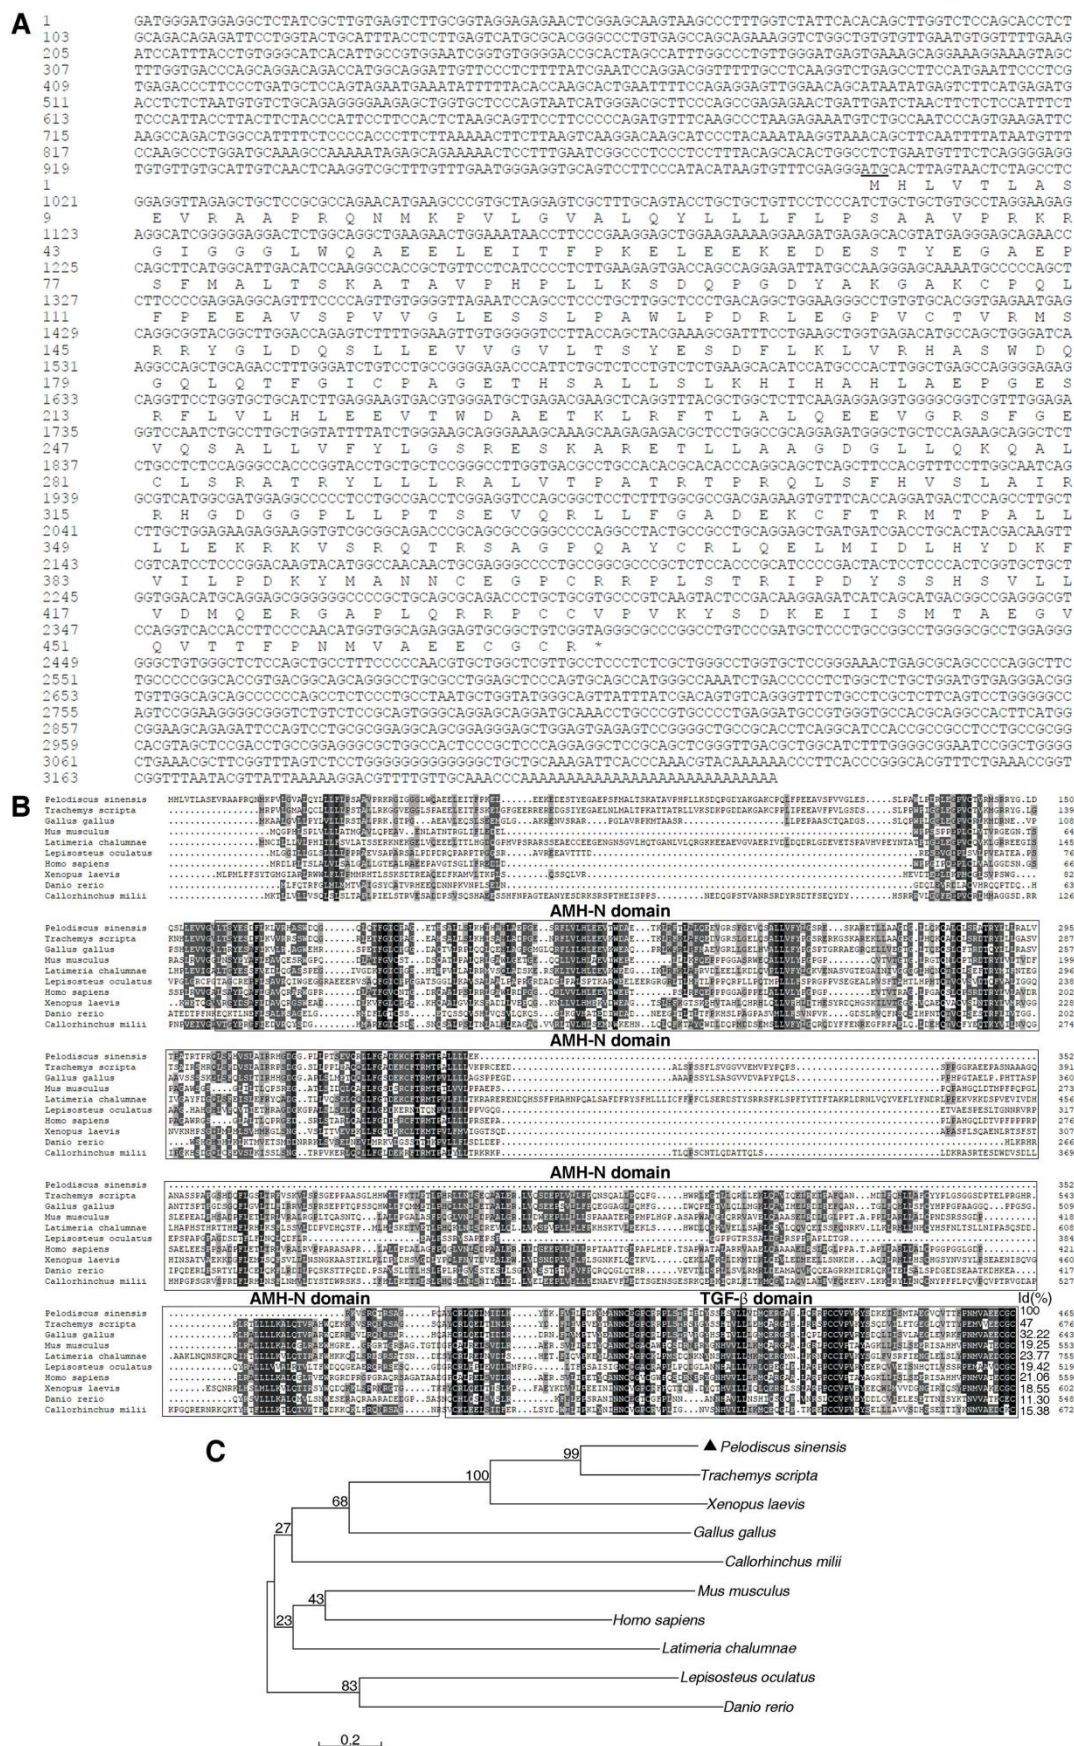

**Figure S3. Sequence and phylogenetic analyses of *P. sinensis Amh*.** (A) The complete cDNA sequence of *P. sinensis Amh* and deduced amino acid sequence. The start codon ATG was underlined, and the stop codon was indicated by an asterisk. (B) Alignment of amino acid sequence of *P. sinensis* AMH with those from other typical species. The two characteristic functional domains of the TGF- $\beta$  superfamily, AMH-N and TGF- $\beta$  domain, were marked. (C) AMH phylogenetic tree from *P. sinensis* and other typical species based on Neighbor-Joining (N-J) method. Numbers at branches were confidence values based on 1000 bootstraps. Each branch length scale in terms of genetic distance was indicated above the tree.

**Figure S4**

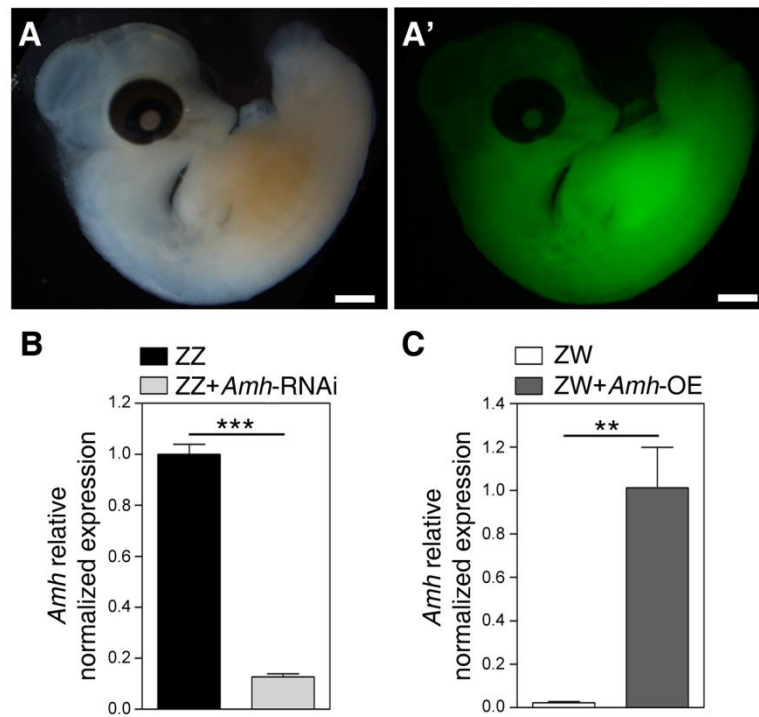

**Figure S4. Establishment of *Amh*-Knockdown and -overexpressing turtle model using lentivirus vectors.** (A, A') The whole embryos of stage 15 infected with scrambled lentiviral vector (LV-NC) at stage 14 showed widespread GFP expression. Bright (A) and epifluorescence (A') images. Scale bars are 1 mm. (B, C) qRT-PCR of *Amh* showed >5-fold downregulation in ZZ gonads with LV-*Amh*-shRNA treatment (B) and >50-fold upregulation in ZW gonads with LV-*Amh*-OE treatment (C), respectively. Data are shown as means  $\pm$  S.D.  $N \geq 3$ . \*\*,  $P < 0.01$ ; \*\*\*,  $P < 0.001$ .
